1 **Male sex pheromone components in *Heliconius* butterflies released**  
2 **by the androconia affect female choice**

3  
4 Kathy Darragh<sup>1,2\*</sup>, Sohini Vanjari<sup>1,2\*</sup>, Florian Mann<sup>3\*</sup>, Maria F Gonzalez-R<sup>4\*</sup> Colin R  
5 Morrison<sup>2,5</sup>, Camilo Salazar<sup>4</sup>, Carolina Pardo-Diaz<sup>4</sup>, Richard M Merrill<sup>1,2,6</sup>, W Owen McMillan<sup>2</sup>,  
6 Stefan Schulz<sup>3</sup>, Chris D. Jiggins<sup>1,2†</sup>

7  
8 <sup>1</sup>*Department of Zoology, University of Cambridge, Cambridge, Cambridgeshire, United Kingdom*

9 <sup>2</sup>*Smithsonian Tropical Research Institute, Panama, Panama*

10 <sup>3</sup>*Institute of Organic Chemistry, Technische Universität Braunschweig, Braunschweig, Germany*

11 <sup>4</sup>*Biology Program, Faculty of Natural Sciences and Mathematics, Universidad del Rosario, Bogota, Colombia*

12 <sup>5</sup>*Department of Integrative Biology, University of Texas at Austin, Austin, Texas, United States*

13 <sup>6</sup>*Division of Evolutionary Biology, Faculty of Biology, Ludwig-Maximilians-Universität München, Munich, Germany*

14 \**These authors contributed equally to this work*

15 †*Corresponding author: c.jiggins@zoo.cam.ac.uk*

16 **Abstract**

17 Sex specific pheromones are known to play an important role in butterfly courtship, and may  
18 influence both individual reproductive success and reproductive isolation between species.  
19 Extensive ecological, behavioural and genetic studies of *Heliconius* butterflies have made a  
20 substantial contribution to our understanding of speciation. Male pheromones, although long  
21 suspected to play an important role, have received relatively little attention in this genus. Here,  
22 we combine morphological, chemical, and behavioural analyses of male pheromones in the  
23 Neotropical butterfly *Heliconius melpomene*. First, we identify putative androconia that are  
24 specialized brush-like scales that lie within the shiny grey region of the male hindwing. We then  
25 describe putative male sex pheromone compounds, which are largely confined to the androconial  
26 region of the hindwing of mature males, but are absent in immature males and females. Finally,  
27 behavioural choice experiments reveal that females of *H. melpomene*, *H. erato* and *H. timareta*  
28 strongly discriminate against conspecific males which have their androconial region  
29 experimentally blocked. As well as demonstrating the importance of chemical signalling for  
30 female mate choice in *Heliconius* butterflies, the results describe structures involved in release of  
31 the pheromone and a list of potential male sex pheromone compounds.

32

33 Key words: *Heliconius*, pheromone, sexual selection, mate choice, androconia, Lepidoptera,  
34 reproductive isolation.

35

36

## 37 **Introduction**

38           Sex pheromones are species-specific blends of chemical compounds that mediate  
39 intraspecific communication between males and females (Wyatt, 2003, 2014). Among insects,  
40 pheromone communication can involve a single chemical, but often relies on a complex  
41 combination of multiple chemical components (Grillet, Dartevelle & Ferveur, 2006; Nieberding  
42 et al., 2008; Symonds, Johnson & Elgar, 2012). This chemical complexity provides the potential  
43 to convey sophisticated information, such as the inbreeding status of the emitter (Ando, Inomata  
44 & Yamamoto, 2004; van Bergen et al., 2013; Menzel, Radke & Foitzik, 2016), mate quality  
45 (Dussourd et al., 1991; Ruther et al., 2009), and species identity (Danci et al., 2006; Saveer et al.,  
46 2014). Perhaps the best studied insect sex pheromones are those produced by female moths to  
47 attract mating partners, often over long distances (Löfstedt, 1993; Smadja & Butlin, 2008).  
48 However, male insects also produce sex pheromones (Eggert & Müller, 1997; Kock, Ruther &  
49 Sauer, 2007; Ruther et al., 2009; Meinwald, Meinwald & Mazzocchi, 1969), and chemical  
50 signalling can occur over short distances (Nishida et al., 1996; Mas & Jallon, 2005; Smadja &  
51 Butlin, 2008; Wicker-Thomas, 2011; Grillet et al., 2012).

52           Sex pheromones can play a key role in determining the reproductive success of  
53 individuals within a species, and may also result in reproductive isolation between species if  
54 signals diverge (Johansson & Jones, 2007; Smadja & Butlin, 2008; Wyatt, 2014). Within  
55 Lepidoptera, the importance of chemical signalling in mate choice and speciation is well  
56 established among moth species (Phelan & Baker, 1987; Löfstedt, 1993; Bethenod et al., 2004;  
57 Dopman, Robbins & Seaman, 2010; Lassance et al., 2010; Saveer et al., 2014). Most moths fly at  
58 night, when visual signalling is unlikely to be as effective in attracting mates. In contrast,  
59 butterflies are mostly diurnal and visual signals are usually important for initial mate attraction  
60 (Vane-Wright & Boppré, 1993). However, chemical signals can play other roles in butterfly mate  
61 choice, with evidence that close-range courtship interactions often involve pheromones emitted  
62 by males, in contrast to the long-distance signalling with female-emitted pheromones more  
63 commonly observed in moths (Vane-Wright & Boppré, 1993). Acceptance behaviour in the  
64 queen butterfly *Danaus berenice*, for example, is regulated by a dihydropyrrolizine alkaloid  
65 released by the male during courtship (Brower & Jones, 1965; Meinwald, Meinwald &  
66 Mazzocchi, 1969; Pliske & Eisner, 1969). Another danaine butterfly, *Idea leuconoe*, displays  
67 brush-like structures, called ‘hair-pencils’, emitting a mixture of volatiles during courtship,

68 which when applied to dummy males elicits an acceptance posture in females (Nishida et al.,  
69 1996). *Pieris rapae* and *P. brassicae* both use macrocyclic lactones as a pheromone to induce  
70 acceptance in females (Yildizhan et al., 2009). Finally, in *Bicyclus anynana* males with reduced  
71 amounts of male sex pheromone have decreased mating success, implying a direct involvement  
72 in reproductive fitness (Nieberding et al., 2008, 2012).

73 Here we focus on the potential role of male pheromones in *Heliconius* butterflies.  
74 *Heliconius* is a diverse Neotropical genus, which has been extensively studied in the context of  
75 adaptation and speciation (Jiggins, 2008; Supple et al., 2014; Merrill et al., 2015). These  
76 butterflies are well known for Müllerian mimicry, in which unrelated species converge on the  
77 same warning signal to more efficiently advertise their unpalatability to predators. Closely  
78 related *Heliconius* taxa, however, often differ in colour pattern and divergent selection acting on  
79 warning patterns is believed to play an important role in speciation (Bates, 1862; Jiggins et al.,  
80 2001; Merrill et al., 2011b).

81 Male *Heliconius* display conspicuous courtship behaviours likely because the availability  
82 of receptive females in nature is limited. Female re-mating is a rare event in *Heliconius* (Walters  
83 et al., 2012) and males must compete to find virgin females within a visually complex  
84 environment (Merrill et al., 2015). In addition, males donate a nutrient-rich spermatophore  
85 during mating (Boggs & Gilbert, 1979; Boggs, 1981) which, together with costs associated with  
86 extended copulation, will select for discrimination against less suitable mates in both sexes.  
87 Crane (Crane, 1955) demonstrated that a combination of colour (hue) and movement stimulates  
88 courtship by *Heliconius* males. More recently, it has repeatedly been shown across multiple  
89 *Heliconius* species that males are more attracted to their own warning pattern than that of closely  
90 related taxa (Jiggins et al., 2001; Jiggins, Estrada & Rodrigues, 2004; Kronforst et al., 2006;  
91 Melo et al., 2009; Muñoz et al., 2010; Merrill et al., 2011a,b; Merrill, Chia & Nadeau, 2014;  
92 Finkbeiner, Briscoe & Reed, 2014; Sánchez et al., 2015).

93 In addition to colour pattern, male *Heliconius* also use chemical signals to locate and  
94 determine the suitability of potential mates. This includes the use of green leaf volatiles during  
95 mate searching. Six-carbon alcohols and acetates are released by host plants in larger amounts  
96 after leaf tissue damage caused by caterpillars, which adult males of the pupal mating species *H.*  
97 *charithonia* then use to find potential mates (Estrada & Gilbert, 2010). Once males find pupae  
98 they also use chemical cues to determine sex (Estrada et al., 2010). Supporting a further role for

99 chemical signals, *Heliconius erato* males distinguish between wings dissected from conspecific  
100 and local *H. melpomene* females that are virtually identical in wing pattern, but this effect  
101 disappears after wings have been washed in hexane (Estrada & Jiggins, 2008).

102 As well as attraction, chemicals can also be involved in repulsion. Males are repelled by a  
103 strong odour released by previously mated females (Gilbert, 1976). This ‘anti-aphrodisiac’ is  
104 produced by males soon after eclosion and is then transferred during copulation (Schulz et al.,  
105 2008). The abdominal glands of male *H. melpomene*, for example, contain a complex chemical  
106 bouquet consisting of the volatile compound (*E*)- $\beta$ -ocimene together with some trace  
107 components and esters of common C<sub>16</sub> – and C<sub>18</sub> – fatty acids with alcohols, where  $\beta$ -ocimene  
108 acts as the main antiaphrodisiac component (Schulz et al., 2008). This antiaphrodisiac effect  
109 occurs in several *Heliconius* species, which show species-specific patterns of scent gland  
110 constituents (Gilbert, 1976; Estrada et al., 2011).

111 Despite the focus on male mate choice, analysis of courtship in *Heliconius* has shown  
112 that females can exhibit rejection behaviours, such as raising their abdomen and flattening their  
113 wings (Mallet, 1986; Klein & Araújo, 2010). There are also a number of observations that  
114 indicate a role for chemical recognition in mate choice. *Heliconius erato* males separate their  
115 wings during courtship to reveal the silvery overlap region, suggested to be involved in the  
116 distribution of pheromones. This behaviour, described as androconial exposition, occurs in every  
117 courtship that results in mating, suggesting that pheromones influence the female response  
118 (Klein & Araújo, 2010). Additionally, direct evidence that *Heliconius* females use chemical  
119 signals to distinguish conspecific males comes from studies of the closely related species *H.*  
120 *timareta* and *H. melpomene*, which share the same warning patterns in Peru (Mérot et al., 2015).  
121 Males experimentally treated with abdominal scent glands and wing extracts of heterospecifics  
122 show a reduced probability of mating. Chemical analysis of both abdominal glands and whole  
123 wings provides evidence for qualitative and quantitative differences in the chemical signatures  
124 between these closely related species (Mérot et al., 2015).

125 Here, we investigate the role of chemical signalling in female mate choice in *Heliconius*  
126 at three levels. First, we investigate morphological structures potentially associated with  
127 pheromone production. In butterflies, a variety of species-specific structures including brushes,  
128 fans, and differentiated scales on wings, legs or abdomen are used to expose pheromones  
129 produced in associated glands (Wyatt, 2003; Nieberding et al., 2008). In particular, male-specific

130 scent glands, termed androconia, are common across the Lepidoptera. In male *Heliconius*, a  
131 patch of shiny grey scales is present on the overlapping region of the hind and forewing (Fig. 1).  
132 The observed sexual dimorphism in this trait suggests that these are androconia, and may be  
133 associated with a male sex pheromone (Emsley, 1963). Furthermore, earlier authors have  
134 identified brush-like scales in this region that are the putative site for pheromone production and  
135 emission (Müller, 1912; Barth, 1952). Here we investigate the structure of these scales using  
136 scanning electron microscopy. Second, we complement recently published chemical analysis of  
137 whole *H. melpomene* wings (Mérot et al., 2015) by dissecting wing regions to identify those  
138 associated with the production of compounds and identify the potential male sex pheromone  
139 compounds isolated from this region. Finally, we carry out mate choice experiments in *H.*  
140 *melpomene rosina*, *H. melpomene malleti*, *H. timareta florenci* and *H. erato demophoon* to test  
141 the importance of pheromones for female choice.

## 142 **Methods**

143 Individuals used for morphological and chemical analyses were from an outbred stock of  
144 *Heliconius melpomene plesseni* and *Heliconius melpomene malleti* (sold as *H. m. aglaope*),  
145 maintained at the University of Cambridge insectaries (Fig. 1A). These two races are from the  
146 region of a hybrid zone in the eastern Andes of Ecuador, and showed considerable inter-racial  
147 hybridization in the stocks, so are treated here as a single population and referred to as the  
148 Ecuador samples. These stocks were established from individuals obtained from a commercial  
149 breeder (Stratford-Upon-Avon Butterfly Farm, Swans Nest, Stratford-Upon-Avon, CV37 7LS,  
150 UK: [www.butterflyfarm.co.uk](http://www.butterflyfarm.co.uk)). Laboratory stocks were maintained on the larval food plants,  
151 *Passiflora menispermifolia* and *P. biflora*. Adult butterflies were fed on ~10% sucrose solution  
152 mixed with an amino acid supplement (Critical Care Formula<sup>®</sup>, Vetark Professional, Winchester,  
153 UK). Further chemical and behavioural analysis were carried out on the mimetic but distantly  
154 related *H. melpomene rosina* and *H. erato demophoon* reared at the Smithsonian Tropical  
155 Research Institute (STRI) facilities in Gamboa, Panama, and are referred to as the Panama  
156 samples. Both males and females of the Panama samples were from outbred stocks established  
157 from wild individuals collected in Gamboa (9°7.4' N, 79°42.2' W, elevation 60 m) within the  
158 nearby Soberania National Park, and San Lorenzo National Park (9°17'N, 79°58'W; elevation  
159 130 m). Larvae were reared on *Passiflora williamsi* and *P. biflora*. Adult butterflies were  
160 provided with ~20% sugar solution with *Psychotria sp.*, *Gurania sp.*, and *Psiguria sp.* as pollen

161 sources. Finally, behavioural experiments were carried out in the mimetic and closely related  
162 species *Heliconius melpomene malleti* and *H. timareta florenci* reared at the insectaries of  
163 Universidad del Rosario (UR) in La Vega, Colombia. These stocks derived from wild caught  
164 individuals from Sucre, Caqueta (01°48'12" N, 75°39'19"W, elevation 1200 m). Larvae were  
165 reared on *Passiflora oerstedii* and adults were provided with *Psiguria sp.* as pollen source and  
166 ~20% sugar solution.

167

### 168 *Morphological analysis*

169 The detailed morphology of androconial scales was determined using a Field Emission  
170 Scanning Electron Microscope. Three males and two females of *H. melpomene* from Ecuador  
171 were used for this analysis. The androconial grey scale region was dissected out from both hind  
172 and forewings and attached to aluminium stubs with carbon tabs and subsequently coated with  
173 20nm of gold using a Quorum/Emitech sputter coater. The gold-coated androconia were then  
174 viewed in an FEI XL30 FEGSEM operated at 5kV. Images were recorded digitally using XL30  
175 software at 500x magnification.

176

177

178 *Characterization of potential male sex pheromone*

179 Wing tissue from ten males (five newly emerged and five 10-day old) and five females  
180 (10-day old) from the Ecuador stock was collected between November 2011 and March 2012 for  
181 chemical analysis. Wings were dissected into four parts: forewing androconia, hindwing  
182 androconia, forewing non-androconia and hindwing non-androconia. The 'androconia' regions  
183 corresponded to the grey-brown region (Fig. 1B and C), with non-androconia corresponding to  
184 the remaining portion of the wing. In females, a region corresponding in size and extent to the  
185 grey-brown region seen in males was dissected. The dissected sections were then immediately  
186 placed in 200µl hexane or dichloromethane in 2 mL glass vials and allowed to soak for three  
187 hours. Initial analysis showed no major differences in extracted chemicals between hexane and  
188 dichloromethane extracts (data not shown). Therefore, the more polar dichloromethane was used  
189 in later analyses. Due to a larger available stock of *H. melpomene rosina* for behavioural  
190 experiments, androconial tissue was also then collected from 20 males and 11 females (both 10-  
191 12 days old) in Panama between February and July 2016. The tissue was soaked in 200µl  
192 dichloromethane in 2ml glass vials, with PTFE-coated caps, for one hour. The extraction time  
193 was shortened as this had no influence on the results (data not shown). The solvent was then  
194 transferred to new vials and stored at -20°C. Samples were evaporated under ambient conditions  
195 at room temperature prior to analysis.

196 Mature male androconial extracts from the Ecuador stock were analysed by gas  
197 chromatography/mass spectrometry (GC/MS) using a Hewlett-Packard model 5975 mass-  
198 selective detector connected to a Hewlett-Packard GC model 7890A, and equipped with a  
199 Hewlett-Packard ALS 7683B autosampler. All other Ecuador extracts were analysed by  
200 comparison to the male androconial results. Extracts from the Panama stock were analysed by  
201 GC/MS using a Hewlett-Packard model 5977 mass-selective detector connected to a Hewlett-  
202 Packard GC model 7890B, and equipped with a Hewlett-Packard ALS 7693 autosampler. HP-  
203 5MS fused silica capillary columns (Agilent, 30 m × 0.25 mm, 0.25 µm) were used in both GCs.  
204 In both cases, injection was performed in splitless mode (250°C injector temperature) with  
205 helium as the carrier gas (constant flow of 1.2 ml/min). The temperature programme started at  
206 50°C, was held for 5 min, and then rose at a rate of 5°C/min to 320°C, before being held at  
207 320°C for 5 minutes. Components were identified by comparison of mass spectra and gas  
208 chromatographic Kovats retention index with those of authentic reference samples and also by



209 analysis of mass spectra. The double bond positions of unsaturated compounds were determined  
210 by derivatisation with dimethyl disulfide (Buser et al., 1983). To confirm chemical structures,  
211 alcohols were synthesised from the corresponding methyl esters by reduction according to  
212 established procedures (Becker & Beckert, 1993, p. 570). The aldehydes were synthesised by  
213 oxidation of the respective alcohols (More & Finney, 2002).

214 Compounds found in the extracts were quantified using gas chromatography with flame  
215 ionisation detection with a Hewlett-Packard GC model 7890A or 7890B equipped with a  
216 Hewlett-Packard ALS 7683B (Ecuador) or 7693 (Panama) autosampler. A BPX-5 fused silica  
217 capillary column (SGE, 25 m × 0.22 mm, 0.25 µm) was used in both cases. Injection was  
218 performed in splitless mode (250°C injector temperature) with hydrogen as the carrier gas  
219 (constant flow of 1.65 ml/min). The temperature programme started at 50°C, held for 5 min, and  
220 then rose to 320°C with a heating rate of 5°C/min. Pentadecyl acetate (10.1 ng) or (Z)-4-  
221 tridecyl acetate (1 ng) were used as internal standard for Ecuador samples, and 2-  
222 tetradecyl acetate (200ng) for Panama samples. Only compounds eluting earlier than hexacosane  
223 were considered for analysis. Later compounds were identified as cuticular hydrocarbons, 2,5-  
224 dialkyltetrahydrofurans, cholesterol and artefacts (*e.g.* phthalates or adipates). The variability in  
225 the late eluting cuticular hydrocarbons was low and did not show characteristic differences  
226 between samples.

227 For the Ecuador samples, groups were visualised as boxplots, due to the high frequency  
228 of absent compounds in the samples. We then used non-parametric Kruskal-Wallis to test for  
229 differences between the amounts of compounds present in different wing regions of mature  
230 males, and also between age and sex categories. This was followed up by Dunn post-hoc testing  
231 (Dinno, 2017; Ogle, 2017), with Bonferroni correction.

232 For the Panama samples, due to the higher sample size, and larger number of compounds  
233 identified we visualised the males and females as two groups using a non-metric  
234 multidimensional scaling (NMDS ordination, based on a Bray-curtis similarity matrix. We used  
235 the metaMDS function in the package vegan (Oksanen et al., 2017), with visualisation using the  
236 package ade4 (Dray & Dufour, 2007). This was followed up with ANOSIM to compare  
237 differences between groups, and non-parametric Kruskal-Wallis tests to determine which  
238 compounds differed between sexes.

239

240 *Behavioural experiments*

241 To test female acceptance of male pheromones, behavioural experiments were conducted  
242 in insectaries at STRI, Gamboa, Panama between February and July 2016, and also in insectaries  
243 at UR in La Vega, Colombia between November 2015 and June 2016. One day old virgin  
244 females were presented with a control male and a ‘pheromone blocked’ male, both of which  
245 were at least ten days old. Males from Panama were treated with transparent nail varnish (Revlon  
246 Liquid Quick Dry containing cyclomethicone, isopropyl alcohol, ethylhexyl palmitate, mineral  
247 oil and fragrance) applied to wings, following Constanzo and Monteiro (Constanzo & Monteiro,  
248 2007). Males from Colombia were treated with transparent nail varnish (Vogue Fantastic).  
249 Pheromone blocked males had the dorsal side of their hindwing androconia blocked, whilst  
250 control males had the same region on the ventral side of the wing blocked.

251 Males were randomly marked using a black Sharpie marker with an ‘x’ on either their left  
252 or right wing for identification purposes during the experiment. In Panama, experiments began at  
253 8.30am and males were left in the cage until 3pm. During mating, *Heliconius* pairs invariably  
254 remain connected for at least an hour and so observations were made every hour to check for  
255 matings. If no mating occurred on the first day, this was repeated the next day with the same  
256 butterflies. Behavioural observations were recorded for 17 trials with *H. erato demophon* and  
257 31 trials with *H. melpomene rosina* for the first two hours of the experiment on day one.  
258 Observations were divided into one minute intervals, during which both female and male  
259 behaviours were recorded. In Colombia, experiments were conducted from 7am to 1pm,  
260 checking every 30 minutes for matings. As before, if no mating occurred on the first day, the  
261 experiment was repeated the next day with the same butterflies. Female behavioural observations  
262 were recorded for 17 trials with *H. timareta florenci* and 18 trials with *H. melpomene malleti*  
263 for the first two hours of the experiment on day one. Observations were divided into one minute  
264 intervals and were recorded only when a male was actively courting the female. Four female  
265 rejection behaviours were recorded: ‘Flutter’ refers to when a female has her abdomen raised and  
266 quickly flaps her wings; ‘Wings open’ refers to when the female is alighted with wings open and  
267 abdomen raised but without wing fluttering; ‘Abdomen up’ refers to when the female is alighted  
268 with wings closed and abdomen concealed within the wings; ‘Fly away’ refers to when the  
269 female flies away from the male. Male courtships, defined as hovering over the female, were  
270 recorded. Mating outcome results were analysed with binomial tests. We used generalized linear

271 mixed models (GLMMs) with a binomial error distribution and logit link function to test whether  
272 females respond differently to control and experimental males. The response variable was  
273 derived from trial minutes in which males courted where females performed a particular  
274 behaviour ('success') or did not ('failure'). Significance was determined with likelihood ratio  
275 tests comparing models with and without male type included as an explanatory variable.  
276 Individual female was included as a random effect in all models to avoid pseudoreplication. All  
277 statistical analyses were performed with *R* version 3.3.1 (R Core Team, 2016), along with the  
278 packages ggplot2 (Wickham, 2009), car (Fox & Weisberg, 2011) and binom (Dorai-Raj, 2014).  
279  
280

281 **Results**

282 *Morphological analysis*

283 We identified a marked sexual dimorphism in scale structure (Fig. 2). In the central  
284 region of the male hindwing androconia along vein Sc+R<sub>1</sub> we identified specialised scales (Fig.  
285 2A), which were absent in females and in the forewing androconia of males (Fig. 2B, 2C). These  
286 scales had brush-like structures at their distal end (Fig. 2D), and were not detected in any other  
287 wing region examined. The brush-like scales were found in alternating rows with scales with a  
288 normal structure. Moving away from the Sc+R<sub>1</sub> wing vein, the density and width of these scales  
289 decreased, with isolated brush-like scales found completely surrounded by normal scales. In  
290 addition, the base of these brush-like scales was more swollen and glandular as compared to  
291 other scales (Fig. 3).

292

293 *Characterization of potential male sex pheromone*

294 We initially investigated candidate wing pheromone composition using a stock of  
295 butterflies from Ecuador. By use of GC/MS and synthesis, six compounds were consistently  
296 found in the male wing extracts from these samples (Fig. 4) that were identified as the aldehydes  
297 (Z)-9-octadecenal, octadecanal, (Z)-11-icosenal, icosanal, and (Z)-13-docosenal and the alkane  
298 henicosane (C<sub>21</sub>).

299 Firstly, a comparison of different wing regions of 10-day old males was carried out (Fig.  
300 5A). Henicosane was found in all regions of the wing and was not considered in further analysis.  
301 The amount of (Z)-9-octadecenal was not significantly different between area categories.  
302 Octadecanal, (Z)-11-icosenal, icosanal and (Z)-13-docosenal showed significant differences  
303 between wing areas. Post-hoc testing found that these four compounds were significantly more  
304 abundant in the hindwing androconia than the rest of the forewing and hindwing, but not the  
305 forewing androconia (see Table S1 for statistical details).

306 Secondly, the hindwing androconia of old males, old females, and young males were  
307 compared (Fig. 5B). With the exception of henicosane, the other compounds were observed to be  
308 age-specific and sex-specific. (Z)-9-octadecenal was found more in old males than young males  
309 or old females but this was not statistically significant. In contrast, octadecanal, (Z)-11-icosenal,  
310 icosanal and (Z)-13-docosenal showed significant differences between age and sex categories.

311 Post-hoc testing found that these compounds were all present in significantly greater amounts in  
312 old males than young males or old females (See Table S2 for statistical details).

313 As stocks of *H. melpomene rosina* from Panama were available for behavioural assays,  
314 we then investigated the chemical composition of this population, using a larger sample size.  
315 These Panama samples showed some similarities to the Ecuadorean samples, although they  
316 contained more compounds and in higher amounts (Fig. 4; Fig. S1 and Table S3). Females and  
317 males grouped separately with NMDS visualisation, and these groups were significantly different  
318 (Fig. S1). In this larger dataset, (*Z*)-9-octadecenal, octadecanal, (*Z*)-11-icosenal, icosanal, (*Z*)-13-  
319 docosenal and heneicosane were all found in significantly larger amounts in old males than old  
320 females, along with many other compounds (Ta. S3). Small amounts of nonadecanal, methyl-  
321 branched octadecanals and their respective alcohols occurred that had not been detected in the  
322 Ecuador samples, potentially due to the difference in equipment sensitivity, genuine geographic  
323 variation, or the fact that the Ecuadorean butterflies have spent more generations in captivity.  
324 Additionally, syringaldehyde was present, which was not detected in the Ecuador samples.

325

### 326 *Behavioural experiments*

327 In our mate choice trials, females of all four species/races discriminated against  
328 conspecific males in which pheromone transmission was experimentally blocked (Table 1).  
329 Across all four taxa tested, only seven of 71 matings (9.8%) were with the pheromone blocked  
330 male, with the remaining 64 matings (90%) being with the control (unblocked) males. This was  
331 not due to altered male courtship attempts as control and experimental males courted equally in  
332 three out of four species (Fig. S2). In experiments with *H. timareta florenci*a, the control males  
333 courted more than experimental males (Fig. S2).

334 We observed no consistent significant differences in female behavioural responses  
335 towards control and experimental males (Fig. S3). Some female behaviours were observed more  
336 often towards experimental males in experiments with *H. melpomene malleti* and *H. timareta*  
337 *florencia* (Fig. S3). In particular, *H. melpomene malleti* females were more likely to open their  
338 wings towards experimental males ( $2\Delta\ln L=17.093$ , d.f.=1,  $p<0.001$ ), fly away ( $2\Delta\ln L= 8.0356$ ,  
339 d.f.=1,  $p<0.01$ ) and also flutter ( $2\Delta\ln L= 15.823$ , d.f.=1,  $p<0.001$ ). Similarly, *H. timareta*  
340 *florencia* females were also more likely to open their wings towards experimental males ( $2\Delta\ln L=$   
341  $22.909$ , d.f.=1,  $p<0.001$ ), fly away ( $2\Delta\ln L= 6.1368$ , d.f.=1,  $p<0.001$ ), and flutter ( $2\Delta\ln L=$

342 26.037, d.f.=1,  $p < 0.001$ ). However, despite these differences, these behavioural responses were  
343 not consistently observed across the four species/races tested. Some of these results are driven by  
344 just a few individual females, with differences in behaviour no longer significant when they are  
345 removed. Furthermore, although some significant female behavioural responses were seen for *H.*  
346 *melpomene malleti* in Colombia, no corresponding difference was found for *H. melpomene*  
347 *rosina* in Panama, where a larger number of courtships were observed, so caution should be  
348 taken when interpreting these results.

349

## 350 **Discussion**

351 Visual cues are known to be important for mate finding and courtship behaviours by male  
352 *Heliconius* butterflies, with implications for reproductive isolation and speciation (Merrill et al.,  
353 2015). Here, we have shown that female choice based on chemical signalling is also important  
354 for reproduction. We have identified compounds associated with sexually mature male wings  
355 and described morphological structures putatively involved in pheromone release. Furthermore,  
356 we have shown that chemical signalling is involved in mating in *Heliconius*, with females from  
357 three different species across four races showing strong discrimination against males which have  
358 had their androconia experimentally blocked.

359 Our results are broadly comparable with another recent analysis of wing compounds in  
360 *Heliconius* (Mérot et al., 2015), although the previous study did not compare different wing  
361 regions, or males and females of the same age. As the previous study also did not use synthesis  
362 to identify compounds, our work is highly complementary and extends their results to confirm  
363 region- and age-specific localization of compounds to older male androconia. Male *Heliconius*  
364 do not become sexually active until several days after eclosion, so the absence of these  
365 compounds from females and younger males is strongly suggestive of a role in mating  
366 behaviour. The compounds are unlikely to be obtained from direct sequestration of compounds  
367 from larval host plants as they are not present in young males or in older females. This suggests  
368 that there could be genetic control of the production of these compounds, and so they have the  
369 potential to play a role in reproductive isolation between species.

370 The restriction of these five putative male sex pheromones, (*Z*)-9-octadecenal,  
371 octadecanal, (*Z*)-11-icosenal, icosanal, and (*Z*)-13-docosenal, to the hindwing androconia of  
372 mature males (Fig. 5A) suggests that pheromone storage or production is restricted to the

373 hindwing. This is supported by the scanning electron microscope images which show special  
374 brush-like scales in the androconial region (Fig. 2A), located primarily around and along the  
375 hindwing vein Sc+R<sub>1</sub>, similar to the depiction in Figure 73 of Emsley's previous morphological  
376 analysis (Emsley, 1963). Similar scales have been described from light microscopy in other  
377 *Heliconius* species, but not previously in *H. melpomene* (Müller, 1912; Barth, 1952). The base of  
378 these special brush-like scales was more swollen and glandular as compared to other scales (Fig.  
379 3), perhaps indicating a role in storage or production of pheromones by these scales. Trace  
380 amounts of chemicals on the forewing androconia may be due to contact in the overlapping  
381 portion of the fore- and hindwings, and both wings may play a role in dispersal of the  
382 compounds during courtship.

383 Samples from Panama showed both a greater diversity and amounts of compounds (Fig.  
384 S1 and Table S3). This might reflect an issue with inbreeding in the Ecuador population because  
385 they were obtained from a commercial breeder, or technical differences between the two  
386 locations where the analysis was performed. However, it could also reflect differences in rearing  
387 conditions or genuine variation between geographic populations of *H. melpomene*. Further work  
388 will be needed to confirm the nature and extent of geographic and individual variation in  
389 pheromone composition.

390 Females exhibited a strong preference for males which did not have their androconia  
391 blocked. This suggests that, as in other butterfly systems (Costanzo & Monteiro, 2007), female  
392 *Heliconius* are actively involved in mating decisions. Nonetheless, there were no consistent  
393 differences in the female behaviours we recorded in our experiments. It is possible that the  
394 important female preference behaviours are subtle and were missed in our study. Alternatively,  
395 female acceptance of a male may instead simply represent a decision to stop rejection  
396 behaviours, and therefore not be associated with any particular characteristic behavioural  
397 response.

398 It remains unclear which compounds are biologically active and exactly what information  
399 is being conveyed. The signal clearly influences female mating decisions, and these compounds  
400 may convey complex information about male species identity, quality, age etc. that are  
401 interpreted by females. It is also unknown whether females, like males, use visual cues in  
402 courtship. The use of multiple signals is common in animal communication (Candolin, 2003).  
403 Whilst butterflies primarily use visual cues to locate mates (Kemp & Rutowski, 2011), it has

404 been shown in *B. anynana* that in addition to visual cues, chemical cues also play a role and are  
405 equally important in sexual selection by female choice (Costanzo & Monteiro, 2007). Our work  
406 establishes the potential for similar multimodal signalling in *Heliconius* butterflies.

407 This study provides evidence for the importance of pheromones in intraspecific mate  
408 choice in *Heliconius* butterflies. Evolution of cues within populations could lead to reproductive  
409 isolation between populations if both cues, and their corresponding preferences, diverge (Ptacek,  
410 2000). In other butterflies, male wing compounds contribute to reproductive isolation between  
411 closely related species (Grula, McChesney & Taylor, 1980; Phelan & Baker, 1987; Bacquet et  
412 al., 2015). Evidence suggests that strong pre-mating barriers in addition to mate preference based  
413 on colour wing pattern exist between *Heliconius cydno* and *H. melpomene* (that differ in colour  
414 pattern) and between the latter and *H. timareta* (that are mimetic) (Mérot et al., 2017). For  
415 example, *H. cydno* males show a preference for their own pattern over that of the closely related  
416 *H. melpomene*, but will court wing pattern models of *H. melpomene*. *Heliconius cydno* males,  
417 however, have virtually never been observed mating with *H. melpomene* females (Naisbit,  
418 Jiggins & Mallet, 2001). On the other hand, although males of the mimetic *H. timareta florencia*  
419 and *H. melpomene malleti* equally court female wing models of both species, interspecific  
420 matings occur in very low frequency (Sánchez et al., 2015; Mérot et al., 2017). Furthermore,  
421 male androconial compounds differ between species (Mérot et al., 2015; Mann et al.,  
422 unpublished data), suggesting that they could play role in reproductive isolation. Future work  
423 will allow us to explore the multidimensional aspect of speciation by understanding both male  
424 and female choice, and the role that multiple modes of signalling could play in reproductive  
425 isolation.

426

## 427 **Acknowledgments**

428 We acknowledge the support of Caroline Nieberding and Christer Löfstedt who provided early  
429 encouragement to pursue this project, and Kelsey Byers who gave useful advice on data analysis  
430 and manuscript preparation. We thank our team at the insectaries in Panama, including Oscar  
431 Paneso, Sylvia Fernanda Garza Reyes and Rachel Crisp. We also thank Oscar Penagos for his  
432 technical support breeding butterflies at insectaries in La Vega, Colombia.

433

434



435 **References**

- 436 Ando T., Inomata S., Yamamoto M. 2004. Lepidopteran Sex Pheromones. In: Schulz S ed. *The*  
437 *Chemistry of Pheromones and Other Semiochemicals I*. Topics in Current Chemistry.  
438 Springer Berlin Heidelberg, 51–96. DOI: 10.1007/b95449.
- 439 Bacquet PMB., Brattström O., Wang H-L., Allen CE., Löfstedt C., Brakefield PM., Nieberding  
440 CM. 2015. Selection on male sex pheromone composition contributes to butterfly  
441 reproductive isolation. *Proceedings of the Royal Society of London B: Biological*  
442 *Sciences* 282:20142734. DOI: 10.1098/rspb.2014.2734.
- 443 Barth R. 1952. Os órgãos odoríferos masculinos de alguns Heliconiinae do Brasil. *Memórias*  
444 *do Instituto Oswaldo Cruz* 50:355–367. DOI: 10.1590/S0074-02761953000100006.
- 445 Bates HW. 1862. Contributions to an insect fauna of the Amazon valley. Lepidoptera:  
446 Heliconidae. *Transactions of the Linnean Society of London* 23:495–566. DOI:  
447 10.1111/j.1095-8312.1981.tb01842.x.
- 448 Becker HG., Beckert R. 1993. *Organikum-Organisch-Chemisches Praktikum*. Wiley-VCH  
449 Weinheim.
- 450 van Bergen E., Brakefield PM., Heuskin S., Zwaan BJ., Nieberding CM. 2013. The scent of  
451 inbreeding: a male sex pheromone betrays inbred males. *Proceedings of the Royal*  
452 *Society of London B: Biological Sciences* 280:20130102. DOI:  
453 10.1098/rspb.2013.0102.
- 454 Bethenod M-T., Thomas Y., Rousset F., Frérot B., Pélozuelo L., Genestier G., Bourguet D.  
455 2004. Genetic isolation between two sympatric host plant races of the European  
456 corn borer, *Ostrinia nubilalis* Hübner. II: assortative mating and host-plant  
457 preferences for oviposition. *Heredity* 94:264–270. DOI: 10.1038/sj.hdy.6800611.

- 458 Boggs CL. 1981. Selection Pressures Affecting Male Nutrient Investment at Mating in  
459 Heliconiine Butterflies. *Evolution* 35:931. DOI: 10.2307/2407864.
- 460 Boggs C., Gilbert LE. 1979. Male contribution to egg production in butterflies: evidence for  
461 transfer of nutrients at mating. *Science* 206:83–84. DOI:  
462 10.1126/science.206.4414.83.
- 463 Brower LP., Jones MA. 1965. Precourtship interaction of wing and abdominal sex glands in  
464 male Danaus butterflies. *Proceedings of the Royal Entomological Society of London.*  
465 *Series A, General Entomology* 40:147–151. DOI: 10.1111/j.1365-  
466 3032.1965.tb00302.x.
- 467 Brown KS. 1981. The Biology of Heliconius and Related Genera. *Annual Review of*  
468 *Entomology* 26:427–456. DOI: 10.1146/annurev.en.26.010181.002235.
- 469 Buser HR., Arn H., Guerin P., Rauscher S. 1983. Determination of double bond position in  
470 mono-unsaturated acetates by mass spectrometry of dimethyl disulfide adducts.  
471 *Analytical Chemistry* 55:818–822. DOI: 10.1021/ac00257a003.
- 472 Candolin U. 2003. The use of multiple cues in mate choice. *Biological Reviews* 78:575–595.  
473 DOI: 10.1017/S1464793103006158.
- 474 Costanzo K., Monteiro A. 2007. The use of chemical and visual cues in female choice in the  
475 butterfly *Bicyclus anynana*. *Proceedings of the Royal Society B: Biological Sciences*  
476 274:845–851. DOI: 10.1098/rspb.2006.3729.
- 477 Crane J. 1955. Imaginal behaviour of a Trinidad butterfly, *Heliconius erato hydara*  
478 Hewitson, with special reference to the social use of color. *Zoologica, New York*  
479 40:167–196.

- 480 Danci A., Schaefer PW., Schopf A., Gries G. 2006. Species-specific close-range sexual  
481 communication systems prevent cross-attraction in three species of *Glyptapanteles*  
482 parasitic wasps (Hymenoptera: Braconidae). *Biological Control* 39:225–231. DOI:  
483 10.1016/j.biocontrol.2006.07.009.
- 484 Dinno A. 2017. dunn.test: Dunn’s Test of Multiple Comparisons Using Rank Sums. R  
485 package version 1.3.4. <https://CRAN.R-project.org/package=dunn.test>.
- 486 Dorai-Raj S. 2014. binom: Binomial Confidence Intervals For Several Parameterizations. R  
487 package version 1.1-1. <https://CRAN.R-project.org/package=binom>.
- 488 Dray S., Dufour AB. 2007. The ade4 package: implementing the duality diagram for  
489 ecologists. *Journal of Statistical Software* 22:1–20. DOI: 10.18637/jss.v022.i04.
- 490 Dussourd DE., Harvis CA., Meinwald J., Eisner T. 1991. Pheromonal advertisement of a  
491 nuptial gift by a male moth (*Utetheisa ornatix*). *Proceedings of the National*  
492 *Academy of Sciences of the United States of America* 88:9224–9227. DOI:  
493 10.1073/pnas.88.20.9224.
- 494 Eggert A-K, Müller JK. 1997. Biparental care and social evolution in burying beetles:  
495 lessons from the larder. In: Choe JC, Crespi BJ eds. *The Evolution of Social Behavior in*  
496 *Insects and Arachnids*. Cambridge: Cambridge University Press, 216–236.
- 497 Emsley MG. 1963. A morphological study of imago Heliconiinae (Lep., Nymphalidae) with  
498 a consideration of the evolutionary relationships within the group. *Zoologica, New*  
499 *York* 48:85–130.
- 500 Estrada C., Gilbert LE. 2010. Host plants and immatures as mate-searching cues in  
501 *Heliconius* butterflies. *Animal Behaviour* 80:231–239. DOI:  
502 10.1016/j.anbehav.2010.04.023.

- 503 Estrada C., Jiggins CD. 2008. Interspecific sexual attraction because of convergence in  
504 warning colouration: is there a conflict between natural and sexual selection in  
505 mimetic species? *Journal of Evolutionary Biology* 21:749–60. DOI: 10.1111/j.1420-  
506 9101.2008.01517.x.
- 507 Estrada C., Schulz S., Yildizhan S., Gilbert LE. 2011. Sexual selection drives the evolution of  
508 antiaphrodisiac pheromones in butterflies. *Evolution; international journal of*  
509 *organic evolution* 65:2843–2854. DOI: 10.1111/j.1558-5646.2011.01352.x.
- 510 Estrada C., Yildizhan S., Schulz S., Gilbert LE. 2010. Sex-specific chemical cues from  
511 immatures facilitate the evolution of mate guarding in *Heliconius* butterflies.  
512 *Proceedings of The Royal Society. Biological Sciences* 277:407–413. DOI:  
513 10.1098/rspb.2009.1476.
- 514 Finkbeiner SD., Briscoe AD., Reed RD. 2014. Warning signals are seductive: Relative  
515 contributions of color and pattern to predator avoidance and mate attraction in  
516 *Heliconius* butterflies. *Evolution* 68:3410–3420. DOI: 10.1111/evo.12524.
- 517 Fox J., Weisberg S. 2011. *An {R} Companion to Applied Regression*. Thousand Oaks, CA: Sage.
- 518 Gilbert LE. 1976. Postmating female odor in *Heliconius* butterflies: a male-contributed  
519 antiaphrodisiac? *Science* 193:419–420. DOI: 10.1126/science.935877.
- 520 Giraldo N., Salazar C., Jiggins CD., Bermingham E., Linares M. 2008. Two sisters in the same  
521 dress: *Heliconius* cryptic species. *BMC Evolutionary Biology* 8:324. DOI:  
522 10.1186/1471-2148-8-324.
- 523 Grillet M., Dartevelle L., Ferveur J-F. 2006. A *Drosophila* male pheromone affects female  
524 sexual receptivity. *Proceedings of the Royal Society B: Biological Sciences* 273:315–  
525 323. DOI: 10.1098/rspb.2005.3332.

- 526 Grillet M., Everaerts C., Houot B., Ritchie MG., Cobb M., Ferveur J-F. 2012. Incipient  
527 speciation in *Drosophila melanogaster* involves chemical signals. *Scientific Reports*  
528 2. DOI: 10.1038/srep00224.
- 529 Grula JW., McChesney JD., Taylor OR. 1980. Aphrodisiac pheromones of the sulfur  
530 butterflies *Colias eurytheme* and *C. Philodice* (Lepidoptera, Pieridae). *Journal of*  
531 *Chemical Ecology* 6:241–256. DOI: 10.1007/BF00987543.
- 532 Jiggins CD. 2008. Ecological Speciation in Mimetic Butterflies. *BioScience* 58:541–548. DOI:  
533 10.1641/B580610.
- 534 Jiggins CD., Estrada C., Rodrigues A. 2004. Mimicry and the evolution of premating isolation  
535 in *Heliconius melpomene* Linnaeus. *Journal of Evolutionary Biology* 17:680–691.  
536 DOI: 10.1111/j.1420-9101.2004.00675.x.
- 537 Jiggins CD., Naisbit RE., Coe RL., Mallet J. 2001. Reproductive isolation caused by colour  
538 pattern mimicry. *Nature* 411:302–305. DOI: 10.1038/35077075.
- 539 Johansson BG., Jones TM. 2007. The role of chemical communication in mate choice.  
540 *Biological Reviews* 82:265–289. DOI: 10.1111/j.1469-185X.2007.00009.x.
- 541 Kemp DJ., Rutowski RL. 2011. The Role of Coloration in Mate Choice and Sexual  
542 Interactions in Butterflies. In: *Advances in the Study of Behavior*. Elsevier, 55–92.
- 543 Klein AL., Araújo AM de. 2010. Courtship behavior of *Heliconius erato phyllis* (Lepidoptera,  
544 Nymphalidae) towards virgin and mated females: conflict between attraction and  
545 repulsion signals? *Journal of Ethology* 28:409–420. DOI: 10.1007/s10164-010-0209-  
546 1.
- 547 Kock D., Ruther J., Sauer KP. 2007. A Male Sex Pheromone in a Scorpionfly. *Journal of*  
548 *Chemical Ecology* 33:1249–1256. DOI: 10.1007/s10886-007-9304-3.

- 549 Kronforst MR., Young LG., Kapan DD., McNeely C., O'Neill RJ., Gilbert LE. 2006. Linkage of  
550 butterfly mate preference and wing color preference cue at the genomic location of  
551 wingless. *Proceedings of the National Academy of Sciences* 103:6575–6580. DOI:  
552 10.1073/pnas.0509685103.
- 553 Lassance J-M., Groot AT., Liénard MA., Antony B., Borgwardt C., Andersson F., Hedenström  
554 E., Heckel DG., Löfstedt C. 2010. Allelic variation in a fatty-acyl reductase gene  
555 causes divergence in moth sex pheromones. *Nature* 466:486–489. DOI:  
556 10.1038/nature09058.
- 557 Löfstedt C. 1993. Moth Pheromone Genetics and Evolution. *Philosophical Transactions of*  
558 *the Royal Society of London B: Biological Sciences* 340:167–177. DOI:  
559 10.1098/rstb.1993.0055.
- 560 Mallet J. 1986. Gregarious roosting and home range in Heliconius butterflies. *National*  
561 *Geographic Research* 2:198–215.
- 562 Mas F., Jallon J-M. 2005. Sexual Isolation and Cuticular Hydrocarbon Differences between  
563 *Drosophila santomea* and *Drosophila yakuba*. *Journal of Chemical Ecology* 31:2747–  
564 2752. DOI: 10.1007/s10886-005-7570-5.
- 565 Meinwald J., Meinwald YC., Mazzocchi PH. 1969. Sex Pheromone of the Queen Butterfly:  
566 Chemistry. *Science* 164:1174–1175. DOI: 10.1126/science.164.3884.1174.
- 567 Melo MC., Salazar C., Jiggins CD., Linares M. 2009. Assortative Mating Preferences Among  
568 Hybrids Offers a Route to Hybrid Speciation. *Evolution* 63:1660–1665. DOI:  
569 10.1111/j.1558-5646.2009.00633.x.
- 570 Menzel F., Radke R., Foitzik S. 2016. Odor diversity decreases with inbreeding in the ant  
571 *Hypoponera opacior*. *Evolution* 70:2573–2582. DOI: 10.1111/evo.13068.

- 572 Mérot C., Frérot B., Leppik E., Joron M. 2015. Beyond magic traits: Multimodal mating cues  
573 in *Heliconius* butterflies. *Evolution* 69:2891–2904. DOI: 10.1111/evo.12789.
- 574 Mérot C., Salazar C., Merrill RM., Jiggins CD., Joron M. 2017. What shapes the continuum of  
575 reproductive isolation? Lessons from *Heliconius* butterflies. *bioRxiv*:107011.
- 576 Merrill RM., Chia A., Nadeau NJ. 2014. Divergent warning patterns contribute to assortative  
577 mating between incipient *Heliconius* species. *Ecology and Evolution* 4:911–917. DOI:  
578 10.1002/ece3.996.
- 579 Merrill RM., Dasmahapatra KK., Davey JW., Dell’Aglia DD., Hanly JJ., Huber B., Jiggins CD.,  
580 Joron M., Kozak KM., Llaurens V., Martin SH., Montgomery SH., Morris J., Nadeau NJ.,  
581 Pinharanda AL., Rosser N., Thompson MJ., Vanjari S., Wallbank RWR., Yu Q. 2015.  
582 The diversification of *Heliconius* butterflies: what have we learned in 150 years?  
583 *Journal of Evolutionary Biology* 28:1417–1438. DOI: 10.1111/jeb.12672.
- 584 Merrill RM., Gompert Z., Dembeck LM., Kronforst MR., McMillan WO., Jiggins CD. 2011a.  
585 Mate preference across the speciation continuum in a clade of mimetic butterflies.  
586 *Evolution* 65:1489–1500. DOI: 10.1111/j.1558-5646.2010.01216.x.
- 587 Merrill RM., Van Schooten B., Scott JA., Jiggins CD. 2011b. Pervasive genetic associations  
588 between traits causing reproductive isolation in *Heliconius* butterflies. *Proceedings*  
589 *of the Royal Society B: Biological Sciences* 278:511–518. DOI:  
590 10.1098/rspb.2010.1493.
- 591 More JD., Finney NS. 2002. A Simple and Advantageous Protocol for the Oxidation of  
592 Alcohols with o-Iodoxybenzoic Acid (IBX). *Organic Letters* 4:3001–3003. DOI:  
593 10.1021/ol026427n.

- 594 Müller F. 1912. X. The Scent-scales of the Male “Maracujá butterflies.” In: Longstaff GB ed.  
595 *Butterfly Hunting in Many Lands*. New York: Longmans, Green & Co., 655–659.
- 596 Muñoz AG., Salazar C., Castaño J., Jiggins CD., Linares M. 2010. Multiple sources of  
597 reproductive isolation in a bimodal butterfly hybrid zone. *Journal of Evolutionary*  
598 *Biology* 23:1312–1320. DOI: 10.1111/j.1420-9101.2010.02001.x.
- 599 Naisbit RE., Jiggins CD., Mallet J. 2001. Disruptive sexual selection against hybrids  
600 contributes to speciation between *Heliconius cydno* and *Heliconius melpomene*.  
601 *Proceedings of the Royal Society of London Series B-Biological Sciences* 268:1849–  
602 1854. DOI: 10.1098/rspb.2001.1753.
- 603 Nieberding CM., Fischer K., Saastamoinen M., Allen CE., Wallin EA., Hedenström E.,  
604 Brakefield PM. 2012. Cracking the olfactory code of a butterfly: the scent of ageing.  
605 *Ecology Letters* 15:415–424. DOI: 10.1111/j.1461-0248.2012.01748.x.
- 606 Nieberding CM., de Vos H., Schneider MV., Lassance J-M., Estramil N., Andersson J., Bång J.,  
607 Hedenström E., Löfstedt C., Brakefield PM. 2008. The Male Sex Pheromone of the  
608 Butterfly *Bicyclus anynana*: Towards an Evolutionary Analysis. *PLoS ONE* 3:e2751.  
609 DOI: 10.1371/journal.pone.0002751.
- 610 Nishida R., Schulz S., Kim CS., Fukami H., Kuwahara Y., Honda K., Hayashi N. 1996. Male sex  
611 pheromone of a giant danaine butterfly, *Idea leuconoe*. *Journal of Chemical Ecology*  
612 22:949–972. DOI: 10.1007/BF02029947.
- 613 Ogle DH. 2017. FSA: Fisheries Stock Analysis. R package version 0.8.13. [https://CRAN.R-](https://CRAN.R-project.org/package=FSA)  
614 [project.org/package=FSA](https://CRAN.R-project.org/package=FSA).
- 615 Oksanen J., Guillaume Blanchet F., Friendly M., Kindt R., Legendre P., McGlinn D., Minchin P.,  
616 O’Hara R., Simpson G., Solymos P., Stevens H., Szoecs E., Wagner H. 2017. vegan:



- 617 Community Ecology Package. R package version 2.4-2. [https://CRAN.R-](https://CRAN.R-project.org/package=vegan)  
618 [project.org/package=vegan](https://CRAN.R-project.org/package=vegan).
- 619 Phelan PL., Baker TC. 1987. Evolution of male pheromones in moths: reproductive isolation  
620 through sexual selection? *Science (New York, N.Y.)* 235:205–207. DOI:  
621 10.1126/science.235.4785.205.
- 622 Pliske TE., Eisner T. 1969. Sex Pheromone of the Queen Butterfly: Biology. *Science*  
623 164:1170–1172. DOI: 10.1126/science.164.3884.1170.
- 624 Ptacek M. 2000. The role of mating preferences in shaping interspecific divergence in  
625 mating signals in vertebrates. *Behavioural Processes* 51:111–134. DOI:  
626 10.1016/S0376-6357(00)00123-6.
- 627 R Core Team 2016. *R: A language and environment for statistical computing*. Vienna,  
628 Austria: R Foundation for Statistical Computing.
- 629 Ruther J., Matschke M., Garbe L-A., Steiner S. 2009. Quantity matters: male sex pheromone  
630 signals mate quality in the parasitic wasp *Nasonia vitripennis*. *Proceedings of the*  
631 *Royal Society B: Biological Sciences* 276:3303–3310. DOI: 10.1098/rspb.2009.0738.
- 632 Sánchez AP., Pardo-Diaz C., Enciso-Romero J., Muñoz AG., Jiggins CD., Salazar C., Linares M.  
633 2015. An introgressed wing pattern acts as a mating cue. *Evolution; International*  
634 *Journal of Organic Evolution* 69:1619–1629. DOI: 10.1111/evo.12679.
- 635 Saveer AM., Becher PG., Birgersson G., Hansson BS., Witzgall P., Bengtsson M. 2014. Mate  
636 recognition and reproductive isolation in the sibling species *Spodoptera littoralis*  
637 and *Spodoptera litura*. *Chemical Ecology* 2:18. DOI: 10.3389/fevo.2014.00018.

- 638 Schulz S., Estrada C., Yildizhan S., Boppré M., Gilbert LE. 2008. An Antiaphrodisiac in  
639 *Heliconius melpomene* Butterflies. *Journal of Chemical Ecology* 34:82–93. DOI:  
640 10.1007/s10886-007-9393-z.
- 641 Smadja CM., Butlin RK. 2008. On the scent of speciation: the chemosensory system and its  
642 role in premating isolation. *Heredity* 102:77–97. DOI: 10.1038/hdy.2008.55.
- 643 Supple M., Papa R., Counterman B., McMillan WO. 2014. The genomics of an adaptive  
644 radiation: insights across the *Heliconius* speciation continuum. *Advances in*  
645 *experimental medicine and biology* 781:249–271. DOI: 10.1007/978-94-007-7347-  
646 9\_13.
- 647 Symonds MRE., Johnson TL., Elgar MA. 2012. Pheromone production, male abundance,  
648 body size, and the evolution of elaborate antennae in moths. *Ecology and Evolution*  
649 2:227–246. DOI: 10.1002/ece3.81.
- 650 Vane-Wright RI., Boppré M. 1993. Visual and Chemical Signalling in Butterflies: Functional  
651 and Phylogenetic Perspectives. *Philosophical Transactions of the Royal Society of*  
652 *London B: Biological Sciences* 340:197–205. DOI: 10.1098/rstb.1993.0058.
- 653 Walters JR., Stafford C., Hardcastle TJ., Jiggins CD. 2012. Evaluating female remating rates in  
654 light of spermatophore degradation in *Heliconius* butterflies: pupal-mating  
655 monandry versus adult-mating polyandry. *Ecological Entomology* 37:257–268. DOI:  
656 10.1111/j.1365-2311.2012.01360.x.
- 657 Wicker-Thomas C. 2011. Evolution of insect pheromones and their role in reproductive  
658 isolation and speciation. *Annales de la Société entomologique de France (N.S.)* 47:55–  
659 62. DOI: 10.1080/00379271.2011.10697696.
- 660 Wickham H. 2009. *ggplot2: Elegant Graphics for Data Analysis*. Springer-Verlag new York.

661 Wyatt TD. 2003. *Pheromones and Animal Behaviour: Communication by Smell and Taste*.  
662 Cambridge University Press.

663 Wyatt TD. 2014. *Pheromones and Animal Behavior: Chemical Signals and Signatures*.  
664 Cambridge University Press.

665 Yildizhan S., van Loon J., Sramkova A., Ayasse M., Arsene C., ten Broeke C., Schulz S. 2009.  
666 Aphrodisiac Pheromones from the Wings of the Small Cabbage White and Large  
667 Cabbage White Butterflies, *Pieris rapae* and *Pieris brassicae*. *ChemBioChem* 10:1666–  
668 1677. DOI: 10.1002/cbic.200900183.

669  
670  
671  
672  
673  
674  
675  
676  
677  
678  
679  
680  
681  
682  
683  
684

685 Figure 1. A) *H. melpomene malleti* (Ecuador sample, left) and *H. melpomene plesseni* (Ecuador  
686 sample, right). B) Dissected wings from specimens of *H. melpomene plesseni* showing sexual  
687 dimorphism in the androconial region, with male (left) and female (right). For each sex, the left  
688 set of wings shows the ventral surface and the right set the dorsal surface. C) Expanded view of  
689 the male androconial region with arrow highlighting the vein Sc+R<sub>1</sub>. The ventral side of the  
690 forewing is on the top and the dorsal side of the hindwing is on the bottom. The pale grey-brown  
691 region in the male wing was dissected for chemical analysis.

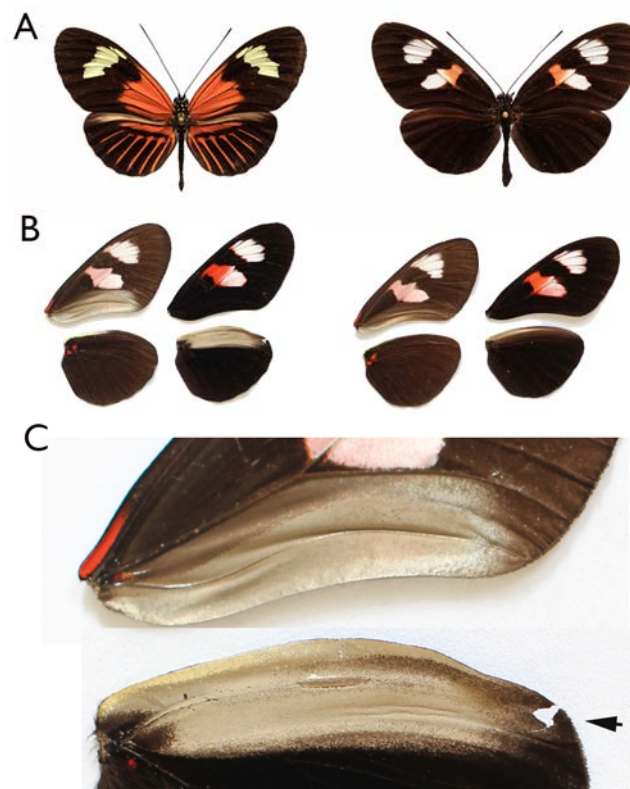

692

693

694

695

696

697

698 Figure 2: SEM image of putative androconial scales of *H. melpomene*. Scales in the region of the  
699 hindwing vein Sc+R<sub>1</sub> and forewing vein 1A are shown. A) male hindwing; B) male forewing  
700 and; C) female hindwing at 500x magnification. d) Magnified view of brush-like structures of  
701 the special scales in the male hindwing androconial region. Scale bars indicate 50  $\mu\text{m}$  (A-C) and  
702 2  $\mu\text{m}$  (D).

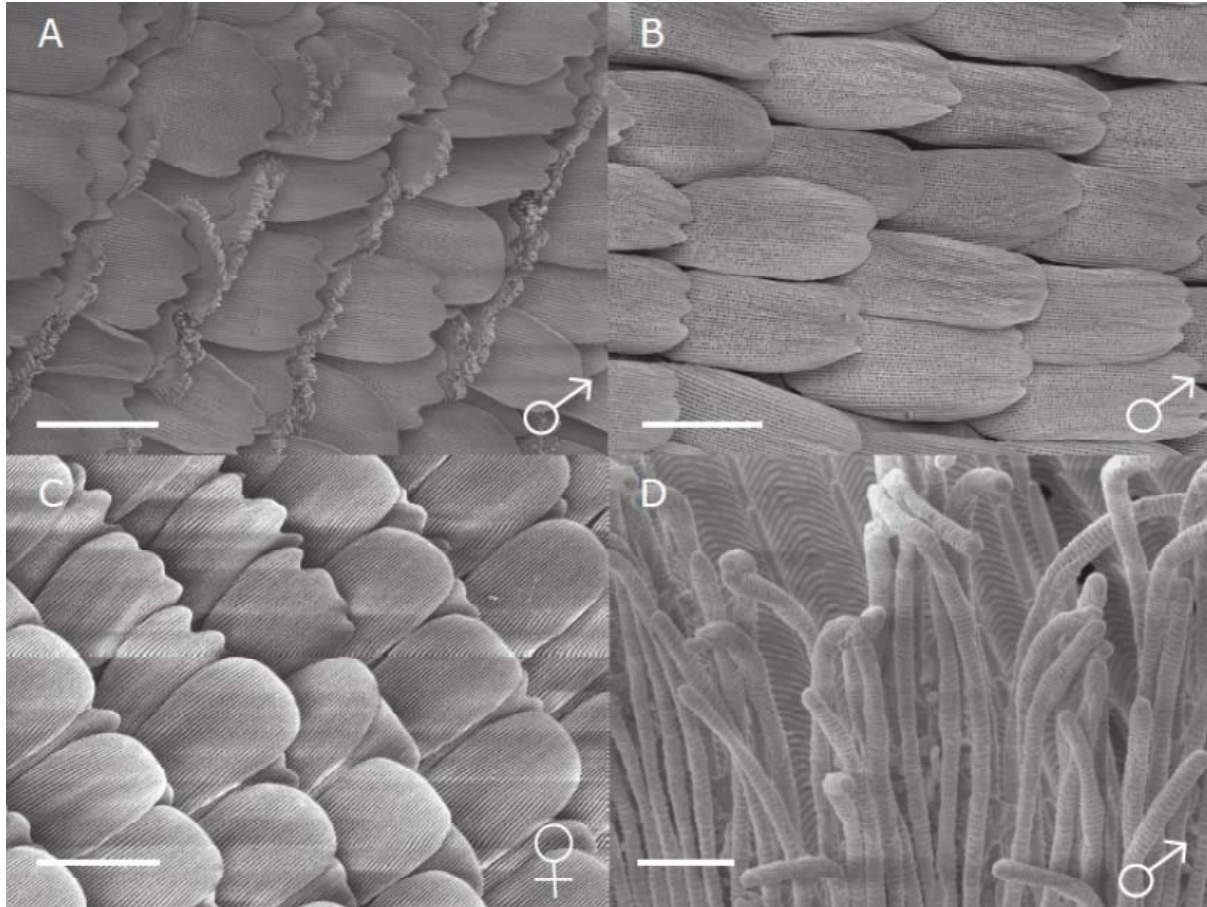

703

704

705 Figure 3: SEM image of the base of a scale of hindwing androconia of *H. melpomene*. A) Scale  
706 from androconial region of female. B) Scale from androconial region of male with brush-like  
707 structures; the arrow highlights the bulge in the scale base in this region. Scale bars indicate 10  
708  $\mu\text{m}$ .

709

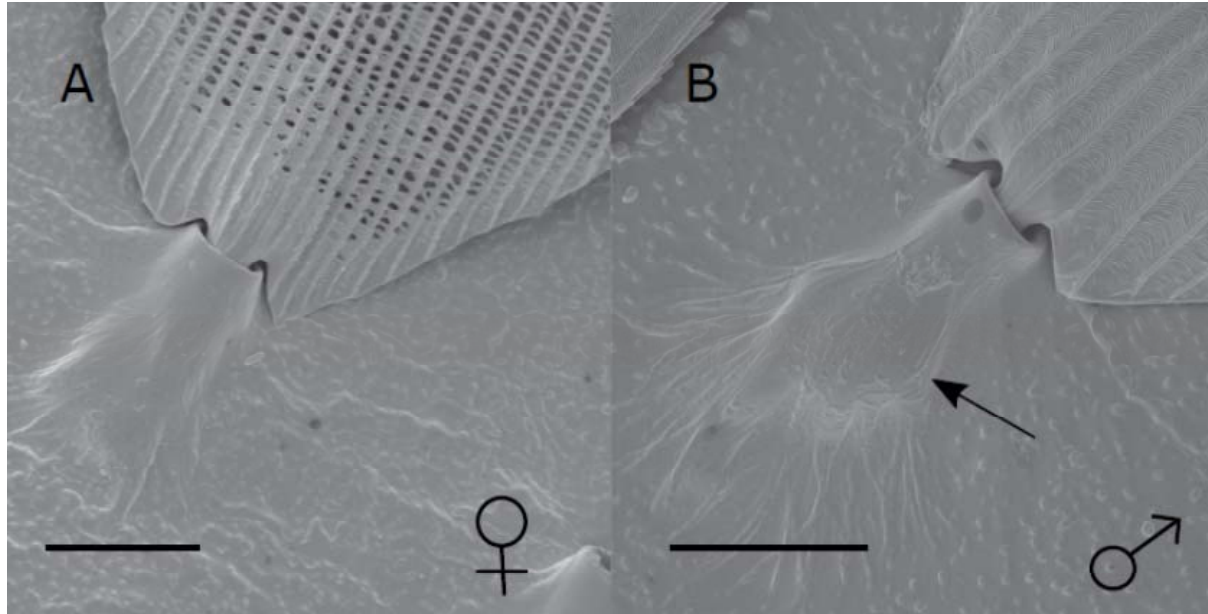

710

711

712

713

714

715

716

717

718

719

720

721

722

723

724

725

726 Figure 4: Regional differences in male androconial extracts. Total ion chromatograms of  
727 extracts from the androconial region of an Ecuadorian *H. melpomene* and a Panamanian *H.*  
728 *melpomene rosina* male hindwing. 1: syringaldehyde; 2: (*Z*)-9-octadecenal; 3: octadecanal;  
729 4: methyloctadecanals; 5: 1-octadecanol; 6: heneicosane; 7: methyloctadecan-1-ols and  
730 nonadecanal; 8: (*Z*)-11-icosenal; 9: icosanal; 10: (*Z*)-11-icosenol; 11: tricosane; 12: (*Z*)-13-  
731 docosenal. All peaks eluting later than 44 min are cuticular compounds consisting of larger  
732 *n*-alkanes, 2,5-dialkyltetrahydrofurans, cholesterol or are contaminations. IS, internal  
733 standard.

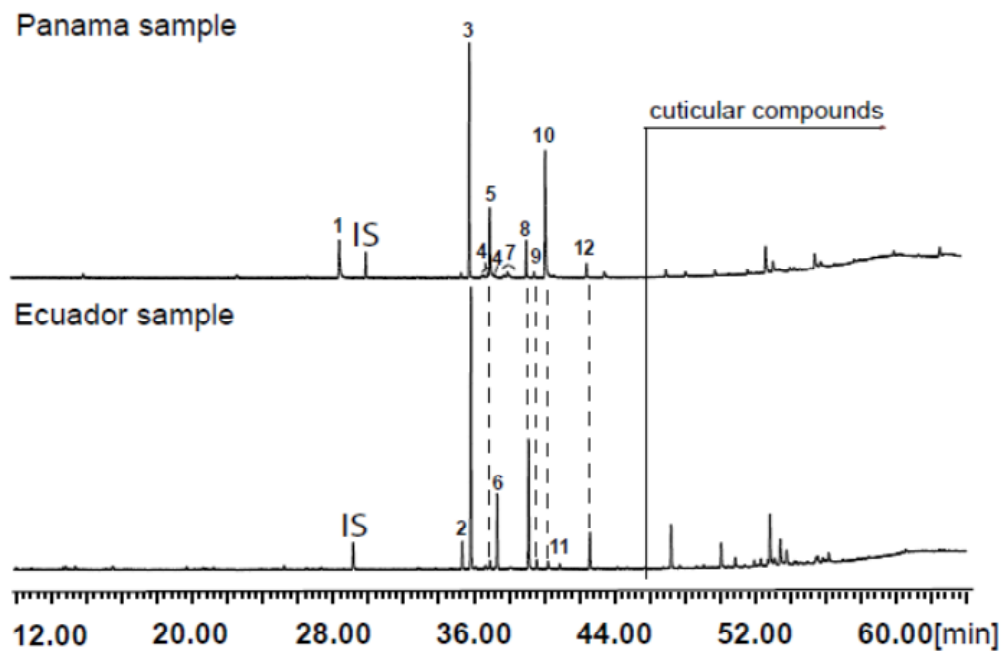

734

735

736

737 Figure 5: Compounds detected by GC/MS of *H. melpomene* (Ecuador samples) wing extracts. A)  
738 Presence of compounds in different wing regions of five males (10 days post-eclosion). B)  
739 Presence of compounds in five females (10 days post-eclosion), five young males (0 days post-  
740 eclosion) and five old males (10 days post-eclosion).

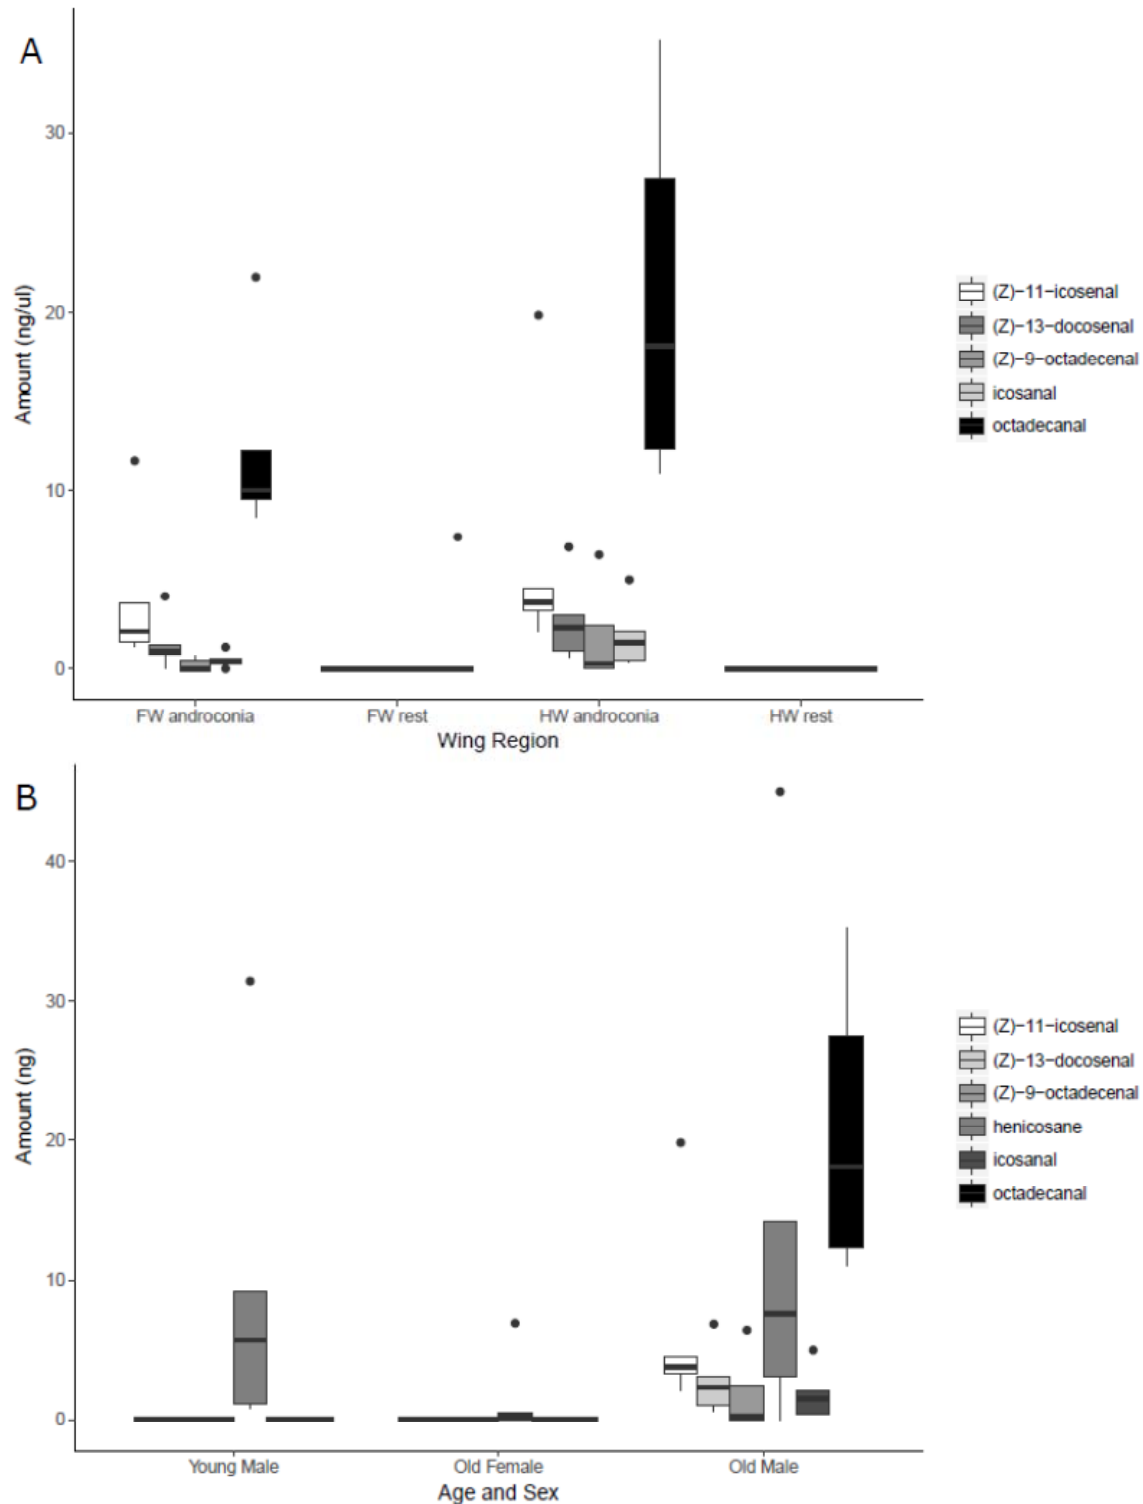



742 Table 1: Outcome of mate choice trials across different species/races. Proportion of successful  
743 copulations with the control male was tested using an exact binomial test. Females mated  
744 significantly more with the control male than the experimental (pheromone-blocked) male in all  
745 four populations. Statistical analysis based on females which mated.  
746

| Species                     | Mated with control | Mated with experimental | Did not mate | p-value (Exact Binomial Test) |
|-----------------------------|--------------------|-------------------------|--------------|-------------------------------|
| <i>H. melpomene rosina</i>  | 15                 | 0                       | 18           | <0.001                        |
| <i>H. erato demophon</i>    | 14                 | 1                       | 31           | <0.001                        |
| <i>H. melpomene malleti</i> | 19                 | 3                       | 8            | <0.001                        |
| <i>H. timareta florenci</i> | 16                 | 3                       | 5            | <0.01                         |

747  
748  
749  
750  
751  
752  
753  
754  
755  
756  
757  
758  
759  
760  
761  
762  
763  
764  
765  
766  
767  
768  
769  
770  
771  
772  
773  
774  
775  
776  
777
